# Supplementary material
Source: PubMed Central journal article supplement (PMC6583393)
Supplement: jamasurg-154-e190484-s001.pdf [file jamasurg-154-e190484-s001.pdf]

## Supplementary Online Content

Dimitrakopoulos C, Vrugt B, Flury R, et al. Identification and validation of a biomarker signature in patients with resectable pancreatic cancer via genome-wide screening for functional genetic variants. Published online April 3, 2019. *JAMA Surg*. doi:10.1001/jamasurg.2019.0484

**eMethods.** Online Methods.

**eTable 1.** Cox survival analysis of top SNPs with a cut-off p-value of  $p < 0.001$  in the European discovery and the TCGA validation PDAC cohorts (adjusted for AJCC stage and R-status)

**eTable 2.** Survival time analysis in the European and TCGA datasets based on Kaplan Meier estimates

**eTable 3.** Hazard Ratios

**eFigure 1.** Workflow diagram of the survival screen.

**eFigure 2.** Survival analysis of tumour-specific survival after resection of PDAC. (A) and (B) Kaplan-Meier survival curves for SNP rs353630 in the European and TCGA cohort, respectively. (C) and (D) Kaplan-Meier survival curves for SNP rs684559 in the European and TCGA cohort, respectively.

**eFigure 3.** Kaplan-Meier survival curves for the two independent prognostic factors AJCC stage (A) and resection margin status (B) in the merged dataset.

**eFigure 4.** Analysis of tumour-related survival for the biomarker signature that combines both SNP loci (rs684559 and rs353630). (A) and (B) Cox multivariate regression survival curves for the combination signature in the European and TCGA cohort, respectively (adjusted to the known independent prognostic factors tumour stage and resection status). (C) and (D) Kaplan-Meier survival curves for the combination signature in the European and TCGA cohort, respectively.

This supplementary material has been provided by the authors to give readers additional information about their work.

## eMethods. ONLINE METHODS

**DNA extraction, quality control and processing (European dataset).** Genomic DNA was extracted from blood samples or normal pathologically confirmed tumour-free tissue adjacent to the resection specimen (fresh-frozen or paraffin-embedded sections) using the blackPREP FFPE DNA Kit (845-BP-0020050, analytikjena, Jena, Germany) at AJ Innuscreen (Berlin, Germany). After extraction, the DNA concentration was measured using the pico-green method, and the Illumina FFPE QC Kit (WG-321-1001, Illumina Inc, San Diego, CA, USA) was utilized to evaluate the quality of prospective DNA samples. According to the specifications of the manufacturer, extracted FFPE samples that passed the quality control test were further processed with the Infinium HD FFPE Restore Kit (WG-321-1002, Illumina Inc, San Diego, CA, USA).

**Genotyping (European dataset).** The genotypes of 2.5M SNPs were determined using the Infinium Omni2.5-8 Kit (20001112- 20001114, Illumina Inc, San Diego, CA, USA) according to the manufacturer's instructions at the Helmholtz Zentrum in Munich, Germany. To ensure a high genotyping quality, only samples with high-confidence genotype calls (SNP call-rate of at least 90%) that did not show extreme departures from Hardy-Weinberg proportions (p-value $\geq$ 0.0001, Hardy-Weinberg Equilibrium test) were included.

**TCGA genotype data and imputation.** TCGA provides genotype data for matched normal tissue using the Affymetrix Genome-Wide Human SNP Array 6.0 with 906,000 probes. We performed a standard quality control step by considering only genotype calls with at least 95% confidence as reported by the Birdseed genotyping algorithm and SNPs that did not show extreme departures from Hardy-Weinberg proportions (p-value $\geq$ 0.0001). Because genotypes in the European discovery dataset were performed on a different platform, imputation was conducted to generate a common dataset from both cohorts using LDlink<sup>17</sup> (<https://analysistools.nci.nih.gov/LDlink/?tab=help#LDproxy>; National Cancer Institute, NCI) with  $r^2 \geq 0.8$  based on the European reference haplotype from Phase 3 (Version 5) of the 1000 Genomes Project<sup>18</sup>.

**Histopathological protocol.** All resected specimens were evaluated uniformly across centres after a standardized protocol for pathologic evaluation in accordance with international norms and regularly updated national guidelines<sup>19-22</sup> (<https://www.leitlinienprogramm-onkologie.de/english-language/>). In brief, the pancreatic head, bile duct, stomach, duodenum transection margins, the medial and uncinate (including both superior mesenteric artery and vein) margins, and the circumferential anterior and posterior border were inked. After taking the margin of the bile duct, stomach, duodenum and the pancreatic neck transection margin, the specimen were cut in 0.3 to 0.5 cm slices in an axial plane perpendicular to the duodenal axis for evaluation of circumferential and soft tissue margins. The margin status was reported separately for the pancreatic neck, bile duct, stomach or duodenum transection margin, and combined for the other margins. A margin was reported as positive (R1) only if tumour cells were present at the surface, i.e. if the clearance equalled 0 mm (R0 narrow:  $\leq$  1mm tumour free margin; R0 wide:  $>$ 1mm). We provide additional information about the pathological protocol in the Online Methods of the revised manuscript. This can be found on page 7 of the Results section.

**Table 1. Cox survival analysis of top SNPs with a cut-off p-value of p<0.001 in the European discovery and the TCGA validation PDAC cohorts (adjusted for AJCC stage and R-status).** For each SNP, we report the rsid, minimal allele frequencies (MAFs), the alleles tested as reported in the Illumina HumanOmni 2.5M array annotation. The following models were tested for survival: (i) AA vs AB vs BB (homozygous genotypes being used as baseline), (ii) AA/AB vs BB and (iii) AA vs AB/BB. We report the estimated differences in tumor-specific survival and the relative p-values. Finally, we report the results for each SNP that is represented either directly or by a proxy SNP with a cut-off rsquare value of r<sup>2</sup>>0.8 on the TCGA Affymetrix Genome-Wide Human SNP Array 6.0 with the nominal p-values as well as the q-values after correction for multiple testing. SNPs rs684559 and rs353630 are highlighted in red font. The only non-coding missense SNPs (rs1047978) identified in the European discovery cohort is highlighted in brown font.

| SNP        | MAF*   | Allele A | Allele B | Significant models**         | Hazard ratio(s)        | P-value(s)                    | SNP       | rsquare | Allele A | Allele B | Hazard ratio(s)        | P-value(s)             | Q-value(s)             | Significant models*** |
|------------|--------|----------|----------|------------------------------|------------------------|-------------------------------|-----------|---------|----------|----------|------------------------|------------------------|------------------------|-----------------------|
| rs75961101 | 0.4141 | T        | C        | AA vs BX; AA vs AB; AA vs BB | 0.3154; 0.3342; 0.2981 | 0.0000133; 9.29e-05; 1.68e-05 | N/A       |         |          |          |                        |                        |                        |                       |
| rs10416513 | 0.3232 | A        | G        | AA vs BX; AA vs AB; AA vs BB | 0.2941; 0.2995; 0.2894 | 0.0000249; 0.000109; 5.44e-05 | N/A       |         |          |          |                        |                        |                        |                       |
| rs2257906  | 0.3384 | T        | C        | AX vs BB; AA vs AB           | 0.4507; 0.4476         | 0.000031; 4.94e-05            | rs2824493 | 1       | A        | G        | 0.8659; 0.5919         | 0.5842; 0.1991         | 0.907; 0.4692          |                       |
| rs1997702  | 0.4596 | T        | C        | AA vs BX; AA vs AB           | 0.4116; 0.3910         | 0.0000387; 5.1e-05            | rs9505573 | 0.9601  | A        | G        | 0.8253; 0.6456         | 0.5141; 0.1552         | 0.907; 0.4692          |                       |
| rs11155639 | 0.4899 | T        | C        | AX vs BB; AA vs AB           | 0.4554; 0.4646         | 0.0000413; 0.000169           | rs1446556 | 1       | A        | C        | 0.9131; 0.7402         | 0.74211; 0.4563        | 0.907; 0.7096          |                       |
| rs2440     | 0.3737 | A        | G        | AA vs BX; AA vs AB; AA vs BB | 0.3558; 0.3360; 0.3864 | 0.0000414; 3.94e-05; 0.000567 | rs207942  | 0.8269  | C        | G        | 0.9498; 0.7986; 0.9224 | 0.8852; 0.4273; 0.8361 | 0.9896; 0.7096; 0.878  |                       |
| rs9857914  | 0.2828 | A        | G        | AA vs BX; AA vs AB; AA vs BB | 0.2931; 0.3172; 0.2802 | 0.0000505; 0.000419; 4.35e-05 | rs3732477 | 1       | A        | G        | 0.9623; 1.1481; 0.7407 | 0.9337; 0.767; 0.538   | 0.9896; 0.8692; 0.8005 |                       |
| rs1047978  | 0.3384 | G        | C        | AX vs BB; AA vs AB           | 2.1183; 2.1446         | 0.0000863; 0.000117           | rs2824493 | 1       | A        | G        | 0.8659; 0.5919         | 0.5842; 0.1991         | 0.907; 0.4692          |                       |
| rs3786721  | 0.4596 | C        | T        | AA vs BX; AA vs AB           | 0.3892; 0.3729         | 0.0000932; 0.000135           | rs3786721 | 1       | C        | T        | 0.8227; 0.6844         | 0.5487; 0.20755        | 0.907; 0.4692          |                       |
| rs2834493  | 0.4293 | T        | C        | AA vs BX; AA vs AB           | 0.3957; 0.3732         | 0.0000947; 9.43e-05           | N/A       |         |          |          |                        |                        |                        |                       |
| rs718607   | 0.4242 | A        | G        | AX vs BB; AA vs AB; AA vs BB | 2.1985; 2.0244; 2.9255 | 0.000111; 0.000808; 5.94e-05  | rs718607  | 1       | A        | G        | 1.1986; 1.2535; 1.1047 | 0.5418; 0.4784; 0.7878 | 0.907; 0.7096; 0.8753  |                       |
| rs2658554  | 0.4798 | T        | C        | AX vs BB; AA vs AB           | 0.4677; 0.3807         | 0.000113; 0.000241            | rs2658554 | 1       | C        | T        | 0.5498; 0.6808         | 0.0388; 0.2863         | 0.4271; 0.8005         |                       |
| rs2033724  | 0.3586 | T        | C        | AX vs BB; AA vs AB           | 0.4824; 0.4617         | 0.000124; 0.000105            | rs2033727 | 0.8155  | C        | G        | 0.7264; 1.0585         | 0.2131; 0.9032         | 0.8787; 0.9499         |                       |
| rs684559   | 0.3788 | A        | G        | AA vs BX; AA vs AB           | 0.4115; 0.3975         | 0.000175; 0.000289            | rs684559  | 1       | A        | G        | 0.2705; 0.2746         | 0.0008; 0.00159        | 0.0257; 0.0270         | AA vs BX; AA vs AB    |
| rs229135   | 0.4242 | T        | C        | AX vs BB; AA vs AB           | 2.241; 2.2961          | 0.000181; 0.000198            | rs229136  | 0.9191  | C        | T        | 0.8791; 0.8783         | 0.6592; 0.6753         | 0.907; 0.82            |                       |
| rs10172861 | 0.4091 | T        | C        | AX vs BB; AA vs AB           | 2.5299; 2.5455         | 0.000185; 0.000248            | rs2121355 | 0.8398  | A        | T        | 1.372; 1.5041          | 0.272; 0.2208          | 0.8977; 0.4692         |                       |
| rs6496463  | 0.4646 | T        | C        | AA vs BX; AA vs AB           | 0.4279; 0.4394         | 0.000208; 0.000587            | N/A       |         |          |          |                        |                        |                        |                       |
| rs2981485  | 0.4444 | C        | T        | AA vs BX; AA vs AB           | 0.4471; 0.4052         | 0.000214; 0.000111            | rs2981485 | 1       | C        | T        | 0.5683; 0.5176         | 0.0609; 0.0453         | 0.5027; 0.2567         |                       |
| rs13418488 | 0.4899 | T        | C        | AA vs BX; AA vs BB           | 0.4267; 0.3738         | 0.000253; 0.000415            | N/A       |         |          |          |                        |                        |                        |                       |
| rs561165   | 0.4293 | A        | G        | AX vs BB; AA vs AB           | 0.4975; 0.4465         | 0.000273; 7.98e-05            | rs2039589 | 1       | C        | G        | 1.3894; 1.2240         | 0.2397; 0.5009         | 0.8787; 0.7096         |                       |
| rs4366492  | 0.4848 | T        | C        | AA vs BX; AA vs BB           | 2.2271; 2.4833         | 0.000338; 0.000293            | rs1079109 | 1       | G        | T        | 1.2204; 1.2264         | 0.5855; 0.6332         | 0.907; 0.8005          |                       |
| rs6517234  | 0.3535 | A        | G        | AA vs BX; AA vs BB           | 0.3961; 0.3636         | 0.000339; 0.000306            | N/A       |         |          |          |                        |                        |                        |                       |
| rs349030   | 0.4394 | A        | G        | AA vs BX; AA vs AB; AA vs BB | 2.3578; 2.2936; 2.4817 | 0.000344; 0.000936; 0.000920  | N/A       |         |          |          |                        |                        |                        |                       |
| rs946055   | 0.4141 | A        | G        | AX vs BB                     | 1.935                  | 0.000366                      | N/A       |         |          |          |                        |                        |                        |                       |
| rs2720117  | 0.2929 | A        | G        | AX vs BB                     | 0.527                  | 0.000396                      | rs2600737 | 1       | G        | T        | 0.8521                 | 0.5425                 | 0.907                  |                       |
| rs2600726  | 0.3131 | A        | G        | AX vs BB                     | 1.892                  | 0.000487                      | rs2600731 | 0.9769  | A        | C        | 1.0987                 | 0.7999                 | 0.9427                 |                       |
| rs1879543  | 0.4899 | T        | C        | AX vs BB                     | 0.4973                 | 0.000494                      | rs4669895 | 0.98    | A        | C        | 1.0105                 | 0.9718                 | 0.9896                 |                       |
| rs4927129  | 0.3485 | T        | C        | AA vs BX; AA vs AB           | 0.3759; 0.3700         | 0.000515; 0.000699            | N/A       |         |          |          |                        |                        |                        |                       |
| rs1997401  | 0.4293 | A        | G        | AX vs BB; AA vs BB           | 0.5004; 0.3603         | 0.000533; 0.000346            | rs1997401 | 1       | A        | G        | 0.8848; 0.8386         | 0.6756; 0.6317         | 0.907; 0.8005          |                       |
| rs2670217  | 0.3939 | A        | G        | AA vs BX; AA vs AB           | 0.3664; 0.3543         | 0.000539; 0.000704            | rs2559537 | 1       | A        | G        | 1.274; 1.2632          | 0.6088; 0.6337         | 0.907; 0.820           |                       |
| rs4130820  | 0.4899 | A        | G        | AX vs BB                     | 2.0291                 | 0.000541                      | rs4130820 | 1       | A        | G        | 1.6977                 | 0.0888                 | 0.5858                 |                       |
| rs12019147 | 0.4545 | A        | G        | AA vs BX                     | 0.4801                 | 0.00056                       | rs1201914 | 1       | A        | G        | 1.3465                 | 0.4008                 | 0.907                  |                       |
| rs33412    | 0.4141 | A        | G        | AA vs BX; AA vs AB; AB vs BB | 0.3655; 0.2599; 0.5095 | 0.000618; 1.57e-05; 0.000605  | rs33412   | 1       | A        | G        | 1.0044; 0.9780; 0.9354 | 0.9896; 0.9499; 0.8187 | 0.9896; 0.9499; 0.8187 |                       |
| rs13432615 | 0.3131 | A        | G        | AA vs BX; AA vs BB           | 0.4233; 0.3836         | 0.000619; 0.000336            | rs1343261 | 1       | A        | G        | 0.7961; 0.4993         | 0.5706; 0.11620        | 0.907; 0.8005          |                       |
| rs962066   | 0.399  | T        | G        | AA vs BX; AA vs BB           | 0.3773; 0.3448         | 0.000631; 0.00049             | 5         | 1       | A        | G        | 0.7961; 0.4993         | 0.5706; 0.11620        | 0.907; 0.8005          |                       |
| rs56319045 | 0.4848 | A        | G        | AA vs BX; AA vs BB           | 0.4466; 0.3514         | 0.000636; 9.82e-05            | rs1004512 | 0.8035  | A        | C        | 1.5116; 1.5550         | 0.3942; 0.382          | 0.907; 0.8005          |                       |
| rs6020324  | 0.3636 | A        | G        | AX vs BB                     | 0.5365                 | 0.000646                      | 6         | 1       | A        | C        | 1.5116; 1.5550         | 0.3942; 0.382          | 0.907; 0.8005          |                       |
| rs7598275  | 0.2626 | A        | G        | AA vs BX;                    | 0.4283                 | 0.000667                      | rs4591400 | 1       | A        | G        | 1.3387                 | 0.7384                 | 0.907                  |                       |
| rs803742   | 0.4192 | A        | G        | AA vs BX; AA vs BB           | 0.4636; 0.4219         | 0.000731; 0.000894            | rs7598275 | 1       | A        | G        | 1.0072                 | 0.987                  | 0.9896                 |                       |
| rs12909013 | 0.3485 | A        | G        | AX vs BB                     | 0.5155                 | 0.000735                      | N/A       |         |          |          |                        |                        |                        |                       |
| rs246770   | 0.3283 | A        | G        | AA vs BX; AA vs AB           | 0.4066; 0.3725         | 0.000743; 0.00044             | N/A       |         |          |          |                        |                        |                        |                       |
| rs10793269 | 0.3788 | C        | T        | AA vs BX; AA vs BB           | 0.4544; 0.3775         | 0.000807; 0.000261            | rs1079326 | 1       | C        | T        | 0.5962; 0.5490         | 0.1337; 0.1098         | 0.7354; 0.8005         |                       |
| rs4757940  | 0.4747 | T        | C        | AX vs BB                     | 0.5339                 | 0.000842                      | 9         | 1       | C        | T        | 0.5962; 0.5490         | 0.1337; 0.1098         | 0.7354; 0.8005         |                       |
| rs353630   | 0.2727 | A        | G        | AA vs BX; AA vs AB           | 0.3814; 0.3491         | 0.000876; 0.000847            | rs353630  | 0.8834  | A        | G        | 1.164                  | 0.6027                 | 0.907                  |                       |
| rs935412   | 0.3687 | T        | C        | AX vs BB                     | 0.4931                 | 0.000884                      | 4         | 1       | A        | G        | 1.164                  | 0.6027                 | 0.907                  |                       |
| rs6664     | 0.3232 | C        | T        | AA vs BX                     | 0.3963                 | 0.000951                      | rs353630  | 0.8834  | A        | G        | 0.1908; 0.2270         | 0.0027; 0.00981        | 0.0452; 0.083          | AA vs BX              |
| rs2160046  | 0.404  | A        | G        | AX vs BB                     | 0.5421                 | 0.000959                      | N/A       |         |          |          |                        |                        |                        |                       |
| rs1332182  | 0.4848 | A        | C        | AX vs BB                     | 0.5346                 | 0.000981                      | rs6664    | 1       | C        | T        | 1.1952                 | 0.6405                 | 0.907                  |                       |
| rs3107     | 0.3182 | T        | G        | AX vs BB                     | 0.5396                 | 0.000982                      | rs2160046 | 1       | A        | G        | 1.4417                 | 0.1604                 | 0.7564                 |                       |
| rs879742   | 0.3333 | T        | G        | AA vs BB; AB vs BB           | 0.2561; 0.2033         | 0.0000989; 0.00000747         | rs1332182 | 1       | A        | C        | 0.91                   | 0.7377                 | 0.907                  |                       |

|            |        |   |   |                    |                |                    |           |        |   |   |                |                  |                |  |  |  |  |
|------------|--------|---|---|--------------------|----------------|--------------------|-----------|--------|---|---|----------------|------------------|----------------|--|--|--|--|
| rs7258937  | 0.4596 | T | C | AA vs BB           | 0.2492         | 0.0000223          | N/A       |        |   |   |                |                  |                |  |  |  |  |
| rs2706759  | 0.298  | A | G | AA vs BB           | 2.945          | 0.0000684          | N/A       |        |   |   |                |                  |                |  |  |  |  |
| rs10955174 | 0.4394 | T | C | AA vs BB; AB vs BB | 2.5872; 2.006  | 0.000134; 0.000948 | rs4388428 | 0.9797 | C | T | 1.3105; 0.8218 | 0.4643; 0.5290   | 0.8005; 0.7053 |  |  |  |  |
| rs1711944  | 0.3737 | C | G | AA vs BB           | 2.8869         | 0.000164           | rs1711944 | 1      | C | G | 0.5569         | 0.1766           | 0.8005         |  |  |  |  |
| rs7409     | 0.257  | T | C | AA vs BB           | 2.9092         | 0.000218           | rs2598446 | 0.9741 | C | T | 1.376          | 0.4193           | 0.8005         |  |  |  |  |
| rs921383   | 0.5    | A | G | AA vs BB           | 0.3975         | 0.000244           | rs7936118 | 0.8828 | C | T | 1.1132         | 0.7625           | 0.8005         |  |  |  |  |
| rs10821968 | 0.399  | T | C | AA vs BB           | 0.4018         | 0.000332           | rs1082196 | 1      | C | T | 1.4828         | 0.3589           | 0.8753         |  |  |  |  |
| rs379977   | 0.4343 | A | C | AA vs BB           | 2.829          | 0.000348           | rs1164118 | 1      | G | T | 1.2829         | 0.4846           | 0.8005         |  |  |  |  |
| rs11641184 | 0.4242 | A | C | AA vs BB           | 0.3904         | 0.000354           | rs2345804 | 0.98   | C | T | 0.7361         | 0.4286           | 0.8005         |  |  |  |  |
| rs4261436  | 0.4444 | T | C | AA vs BB           | 0.4126         | 0.000402           | N/A       |        |   |   |                |                  |                |  |  |  |  |
| rs971530   | 0.4848 | A | C | AA vs BB           | 2.6256         | 0.000478           | N/A       |        |   |   |                |                  |                |  |  |  |  |
| rs1972455  | 0.3788 | A | G | AA vs BB           | 2.5224         | 0.000483           | N/A       |        |   |   |                |                  |                |  |  |  |  |
| rs2426228  | 0.4646 | A | C | AA vs BB           | 2.5453         | 0.000601           | rs6569937 | 1      | A | G | 1.1914         | 0.6404           | 0.8005         |  |  |  |  |
| rs6569937  | 0.4899 | A | G | AA vs BB           | 2.6344         | 0.000622           | N/A       |        |   |   |                |                  |                |  |  |  |  |
| rs4968568  | 0.4545 | A | G | AA vs BB           | 2.7318         | 0.000659           | N/A       |        |   |   |                |                  |                |  |  |  |  |
| rs1134767  | 0.4596 | A | G | AA vs BB           | 0.3742         | 0.000726           | rs2518628 | 1      | A | C | 1.267          | 0.5503           | 0.8005         |  |  |  |  |
| rs7684068  | 0.4646 | T | C | AA vs BB           | 2.373          | 0.000746           | rs1073942 | 1      | A | T | 1.0591; 1.322  | 0.878; 0.336     | 0.878; 0.672   |  |  |  |  |
| rs1075372  | 0.4596 | A | G | AA vs BB; AB vs BB | 2.7731; 2.2704 | 0.000749; 0.000319 | rs1422961 | 1      | A | T | 0.5284; 0.6608 | 0.14619; 0.15465 | 0.8005; 0.6186 |  |  |  |  |
| rs9905663  | 0.4747 | A | C | AA vs BB           | 2.3365         | 0.000785           | N/A       |        |   |   |                |                  |                |  |  |  |  |
| rs6892869  | 0.4091 | T | C | AA vs BB; AB vs BB | 2.3225; 2.7160 | 0.000889; 2.56e-05 | N/A       |        |   |   |                |                  |                |  |  |  |  |
| rs910652   | 0.3687 | T | C | AA vs BB           | 2.7313         | 0.000899           | N/A       |        |   |   |                |                  |                |  |  |  |  |
| rs7167269  | 0.4697 | A | G | AA vs BB           | 0.3962         | 0.000914           | N/A       |        |   |   |                |                  |                |  |  |  |  |
| rs7523821  | 0.404  | A | G | AA vs BB           | 2.3691         | 0.000982           | N/A       |        |   |   |                |                  |                |  |  |  |  |

\* based on the European reference haplotype from Phase 3 (Version 5) of the 1000 Genomes Project

\*\* p-value threshold p<0.001

\*\*\* q-value threshold q<0.05

Abbr. MAF, minimal allele frequency

eTable 2. Survival time analysis in the European and TCGA datasets based on Kaplan Meier estimates

| Cohort        | SNP               | Group    | n   | Number of tumour-related deaths | Means             |            |                         |             | Medians           |            |                         |             | p-value (log-rank) |
|---------------|-------------------|----------|-----|---------------------------------|-------------------|------------|-------------------------|-------------|-------------------|------------|-------------------------|-------------|--------------------|
|               |                   |          |     |                                 | Estimate (months) | Std. Error | 95% Confidence Interval |             | Estimate (months) | Std. Error | 95% Confidence Interval |             |                    |
|               |                   |          |     |                                 |                   |            | Lower Bound             | Upper Bound |                   |            | Lower Bound             | Upper Bound |                    |
| European      | rs353630 (CD44)   | T/T      | 20  | 15                              | 17.7              | 2.3        | 13.2                    | 22.2        | 19.0              | 6.3        | 6.7                     | 31.3        | 0.03               |
|               |                   | C/T      | 67  | 42                              | 42.0              | 6.0        | 30.4                    | 53.7        | 27.7              | 5.0        | 17.9                    | 37.5        |                    |
|               |                   | C/C      | 105 | 75                              | 38.6              | 4.3        | 30.1                    | 47.0        | 20.0              | 2.7        | 14.6                    | 25.4        |                    |
|               |                   | C-allele | 172 | 117                             | 40.9              | 3.7        | 33.6                    | 48.1        | 23.0              | 3.4        | 16.4                    | 29.6        |                    |
|               | rs684559 (CHI3L2) | A/A      | 30  | 24                              | 18.1              | 2.7        | 12.9                    | 23.3        | 15.0              | 1.2        | 12.6                    | 17.4        | 0.001              |
|               |                   | A/G      | 84  | 53                              | 47.0              | 5.7        | 35.8                    | 58.3        | 29.0              | 4.5        | 20.1                    | 37.9        |                    |
|               |                   | G/G      | 79  | 56                              | 34.6              | 4.6        | 25.7                    | 43.6        | 20.0              | 3.7        | 12.7                    | 27.3        |                    |
| Signature*,** | Risk-indicating*  | 47       | 36  | 18.1                            | 2.1               | 14.1       | 22.1                    | 15.0        | 1.5               | 12.0       | 18.0                    | 0.00003     |                    |
|               | Protective**      | 148      | 99  | 43.7                            | 4.1               | 35.7       | 51.6                    | 29.0        | 3.4               | 22.3       | 35.7                    |             |                    |
| TCGA          | rs353630 (CD44)   | T/T      | 6   | 4                               | 11.4              | 1.8        | 7.7                     | 15.0        | 11.0              | 1.5        | 8.1                     | 13.9        | 0.01               |
|               |                   | C/T      | 56  | 26                              | 23.0              | 2.4        | 18.2                    | 27.8        | 19.8              | 0.7        | 18.5                    | 21.1        |                    |
|               |                   | C/C      | 74  | 35                              | 31.2              | 3.6        | 24.1                    | 38.2        | 21.4              | 1.4        | 18.7                    | 24.2        |                    |
|               |                   | C-allele | 130 | 61                              | 28.5              | 2.7        | 23.3                    | 33.8        | 20.4              | 0.9        | 18.5                    | 22.2        |                    |
|               | rs684559 (CHI3L2) | A/A      | 18  | 11                              | 13.7              | 2.1        | 9.6                     | 17.8        | 13.0              | 1.9        | 9.2                     | 16.7        | 0.006              |
|               |                   | A/G      | 70  | 32                              | 29.9              | 3.8        | 22.4                    | 37.4        | 20.2              | 1.8        | 16.6                    | 23.8        |                    |
|               |                   | G/G      | 48  | 22                              | 27.4              | 3.5        | 20.5                    | 34.3        | 20.8              | 0.8        | 19.2                    | 22.5        |                    |
| Signature*,** | Risk-indicating*  | 118      | 54  | 29.4                            | 2.8               | 23.9       | 35.0                    | 20.8        | 1.3               | 18.4       | 23.3                    | 0.001       |                    |
|               | Protective**      | 23       | 15  | 13.0                            | 1.6               | 9.8        | 16.2                    | 11.0        | 1.6               | 7.8        | 14.2                    |             | 0.00001            |
|               |                   |          | 113 | 50                              | 30.3              | 2.9        | 24.5                    | 36.0        | 21.4              | 1.2        | 19.1                    | 23.8        |                    |

\* rs353630 T/T and/or rs684559 A/A genotype  
 \*\* rs353630 C-allele and rs684559 G-allele

eTable 3. Hazard Ratios

| <b>Term</b>  | <b>HR</b> | <b>95%<br/>Confidence<br/>Interval low</b> | <b>95%<br/>Confidence<br/>Interval high</b> | <b>p-value</b> |
|--------------|-----------|--------------------------------------------|---------------------------------------------|----------------|
| AJCC - 1     | 0.7147    | 0.335                                      | 1.525                                       | 0.385          |
| AJCC - 3     | 1.6626    | 0.7844                                     | 3.524                                       | 0.185          |
| AJCC - 4     | 1.7593    | 1.0405                                     | 2.975                                       | 0.035          |
| R-status - 1 | 1.4108    | 1.0377                                     | 1.918                                       | 0.028          |
| R-status - 2 | 2.4212    | 1.2814                                     | 4.575                                       | 0.006          |

eFigure 1. Workflow diagram of the survival screen.

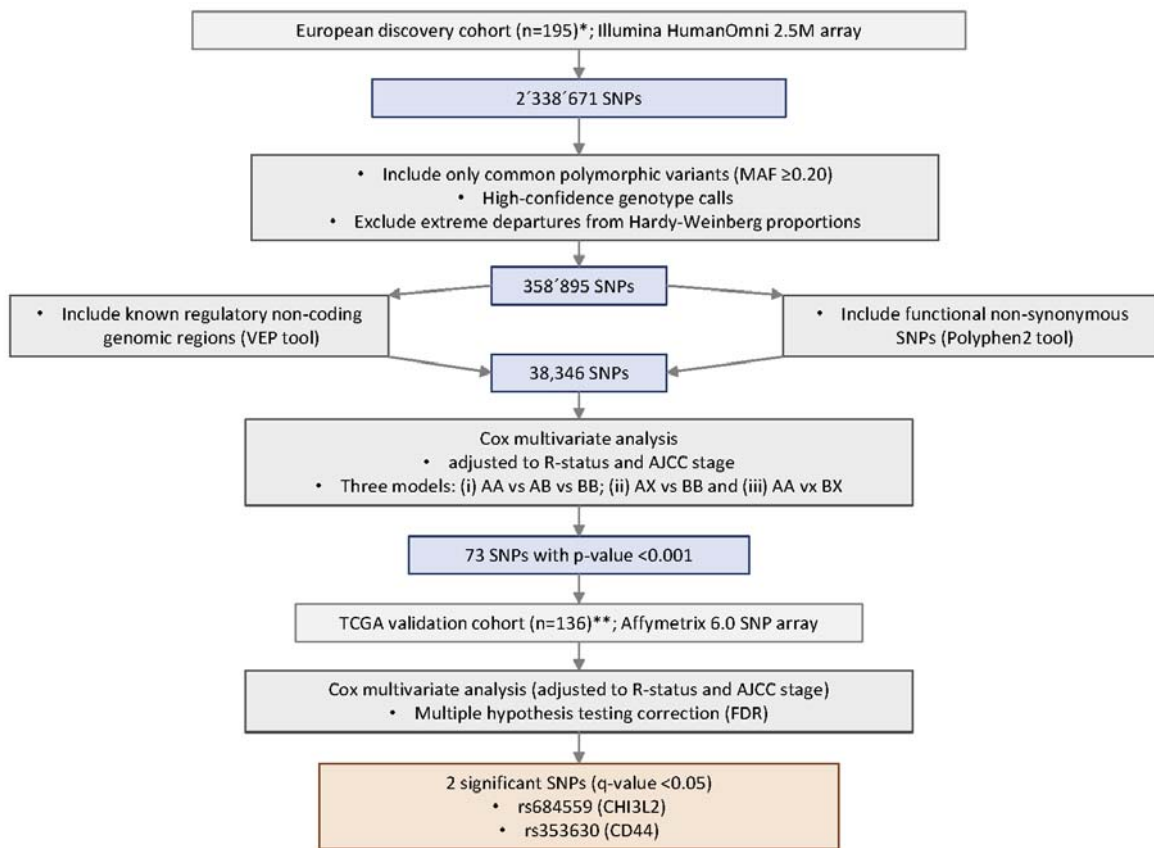

\* Cantonal Hospital Winterthur, University Hospital Zurich, University Clinic Ulm

\*\* TCGA, The Cancer Genome Atlas

\*\*\* Resectable stages of PDAC; Consecutive patients (full clinical follow-up and non-tumour tissue available for DNA analysis)

**eFigure 2.** Survival analysis of tumour-specific survival after resection of PDAC. (A) and (B) Kaplan-Meier survival curves for SNP rs353630 in the European and TCGA cohort, respectively. (C) and (D) Kaplan-Meier survival curves for SNP rs684559 in the European and TCGA cohort, respectively.

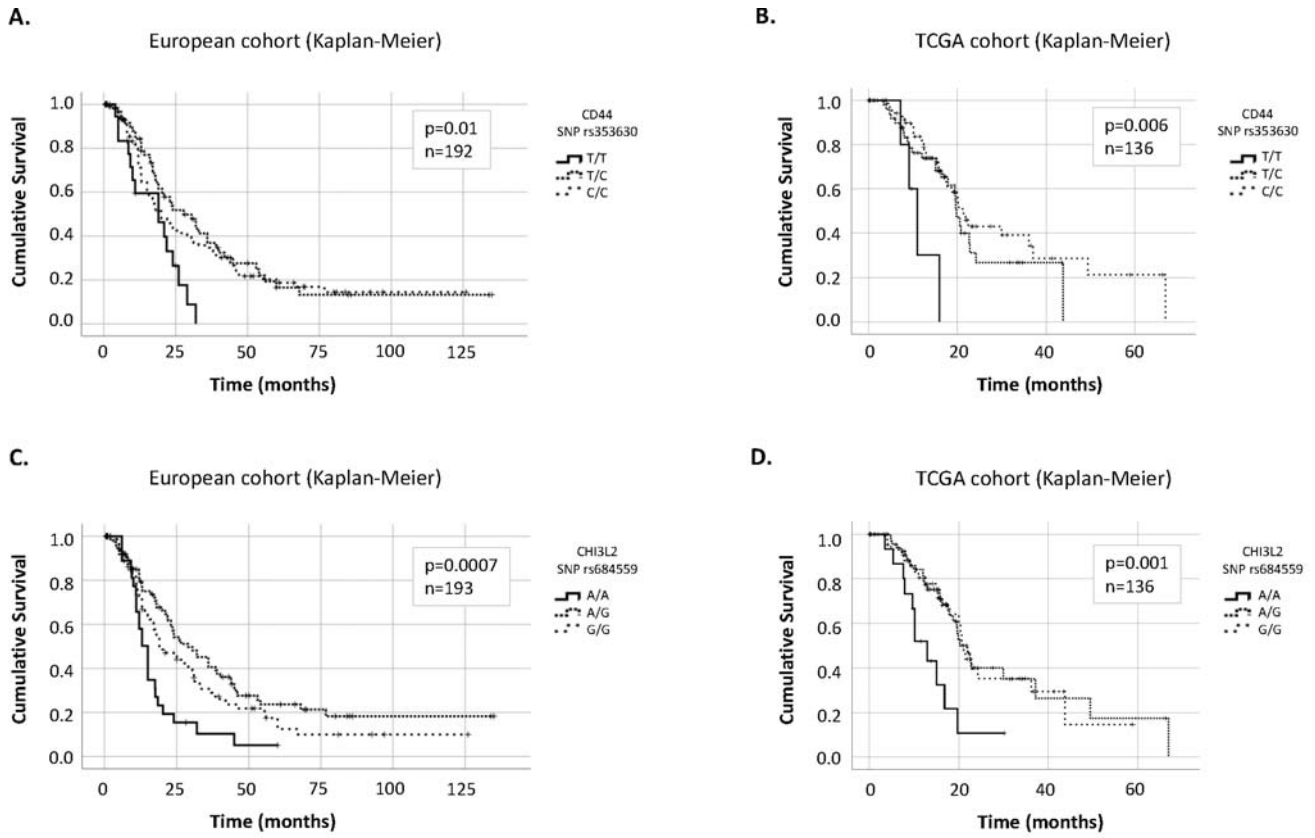

The p-values were determined with the log-rank test.



**eFigure 3. Kaplan-Meier survival curves for the two independent prognostic factors AJCC stage (A) and resection margin status (B) in the merged dataset.**

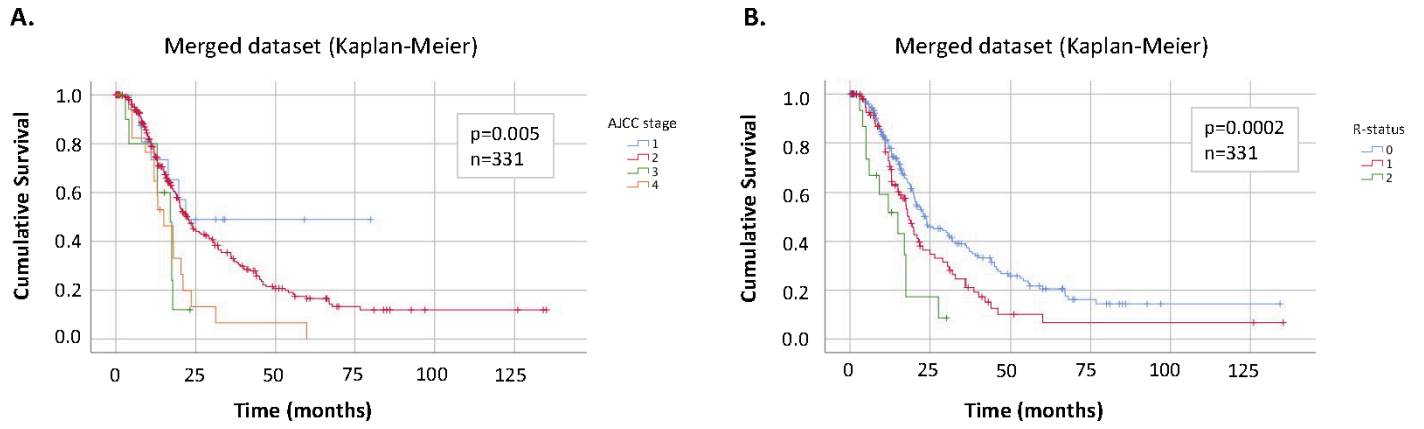

The p-values were determined with the log-rank test.

eFigure 4. Analysis of tumour-related survival for the biomarker signature that combines both SNP loci (rs684559 and rs353630). (A) and (B) Cox multivariate regression survival curves for the combination signature in the European and TCGA cohort, respectively (adjusted to the known independent prognostic factors tumour stage and resection status). (C) and (D) Kaplan-Meier survival curves for the combination signature in the European and TCGA cohort, respectively.

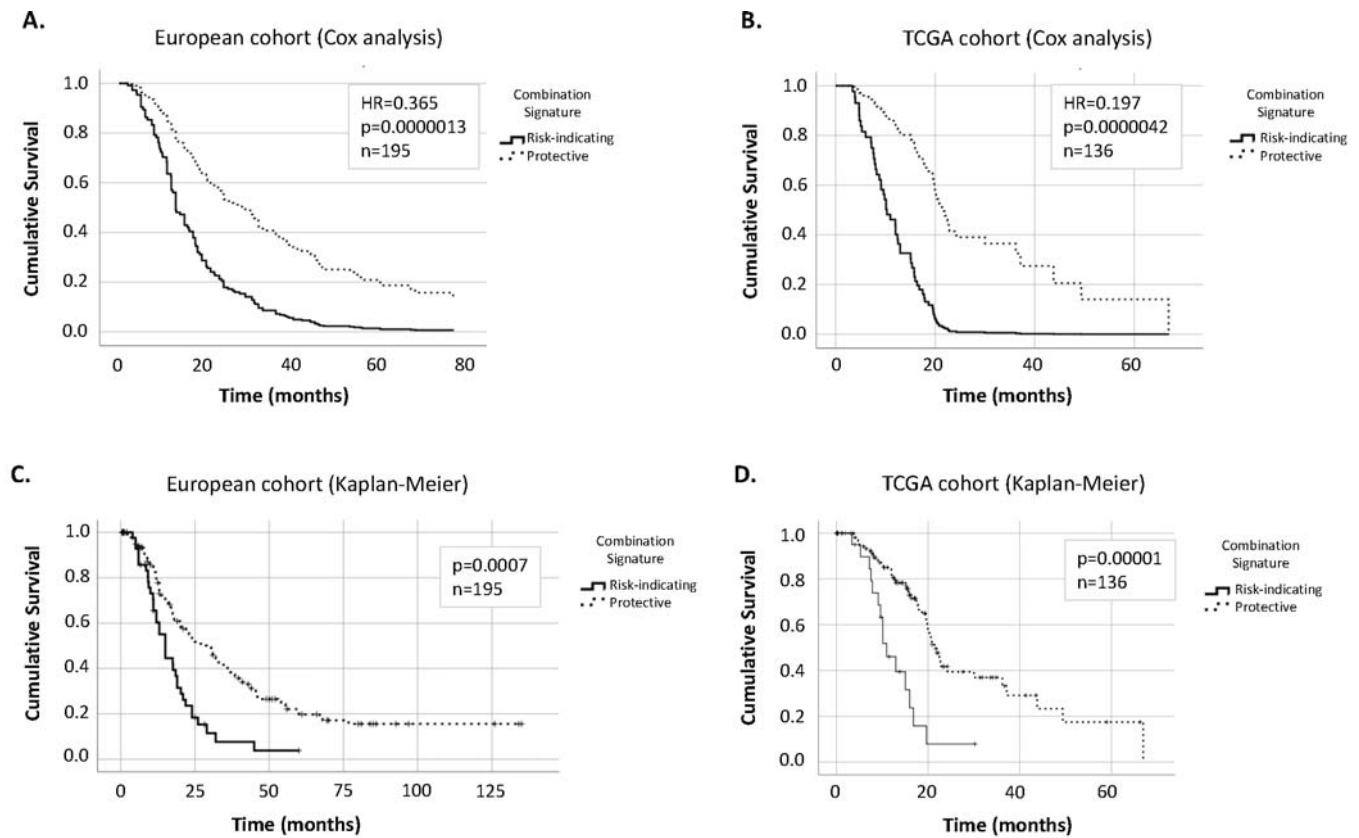

The p-values were determined with the log-rank test.
